# Supplementary material
Source: PubMed Central journal article supplement (PMC4974897)
Supplement: CJN.13591215SupplementaryData1.pdf [file CJN.13591215SupplementaryData1.pdf]

## Authors and affiliations

Mark Canney MB BCh BAO<sup>1</sup>, Paul V. O'Hara BM BS<sup>1</sup>, Caitriona M. McEvoy MB BCh BAO<sup>2</sup>, Samar Medani MBBS<sup>3</sup>, Dervla M. Connaughton LRCPI&SI MB BCh BAO NUI<sup>4</sup>, Ahad A. Abdalla MB BCh BAO<sup>5</sup>, Ross Doyle MB BCh BAO<sup>3</sup>, Austin G. Stack MD<sup>6,13</sup>, Conall M. O'Seaghdha MD<sup>1,3</sup>, Michael R. Clarkson MD<sup>5</sup>, Matthew D. Griffin DMed<sup>7</sup>, John Holian Ph.D<sup>8</sup>, Anthony M. Dorman FRCPATH<sup>9</sup>, Aileen Niland MSc<sup>10</sup>, Mary Keogan FRCPATH<sup>10</sup>, Eleanor M. Wallace Ph.D<sup>11</sup>, Niall P. Conlon FRCPATH<sup>12</sup>, Cathal Walsh Ph.D<sup>13</sup>, Alan Kelly Ph.D<sup>14</sup>, Mark A. Little Ph.D<sup>1</sup>

<sup>1</sup>Trinity Health Kidney Centre, Tallaght Hospital, Dublin 24, Ireland

<sup>2</sup>Department of Renal Medicine, Mater Misericordiae University Hospital, Dublin 7, Ireland

<sup>3</sup>Department of Renal Medicine, Beaumont Hospital, Dublin 9, Ireland

<sup>4</sup>Department of Renal Medicine, Waterford University Hospital, Waterford, Ireland

<sup>5</sup>Department of Renal Medicine, Cork University Hospital, Cork, Ireland

<sup>6</sup>Department of Renal Medicine, University Hospital Limerick, Limerick, Ireland

<sup>7</sup>Department of Renal Medicine, Galway University Hospital, Galway, Ireland

<sup>8</sup>Department of Renal Medicine, St. Vincent's University Hospital, Dublin 4, Ireland

<sup>9</sup>Department of Histopathology, Beaumont Hospital, Dublin 9, Ireland

<sup>10</sup>Department of Immunology, Beaumont Hospital, Dublin 9, Ireland

<sup>11</sup>Department of Immunology, St. Vincent's University Hospital, Dublin 4, Ireland

<sup>12</sup>Department of Immunology, St. James's Hospital, Dublin 8, Ireland

<sup>13</sup>Health Research Institute, University of Limerick, Limerick, Ireland

<sup>14</sup>Department of Public Health and Primary Care, Trinity College Dublin, Dublin 2, Ireland
